# Supplementary material
Source: PubMed Central journal article supplement (PMC3860308)
Supplement: supp_126.24.5598_JCS132233.pdf [file supp_126.24.5598_JCS132233.pdf]

Figure S1

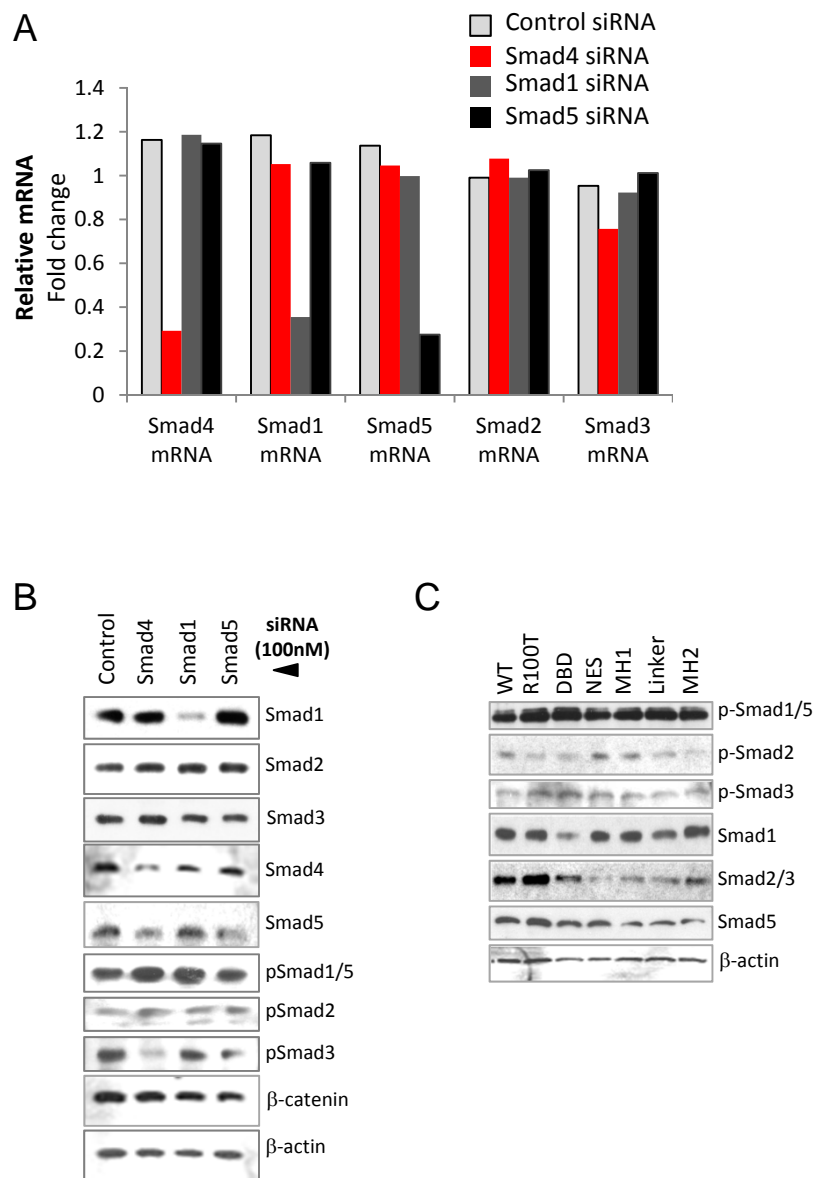

**Figure S1 (A)** QPCR on MC3T3 cells transfected with indicated siRNA. Data represent the average of 2 experiments. **(B)** Immunoblot of whole cell lysates transfected with indicated siRNA. **(B)** Immunoblot on MC3T3 cells transfected with HA-Smad4 mutants.

**Figure S2**

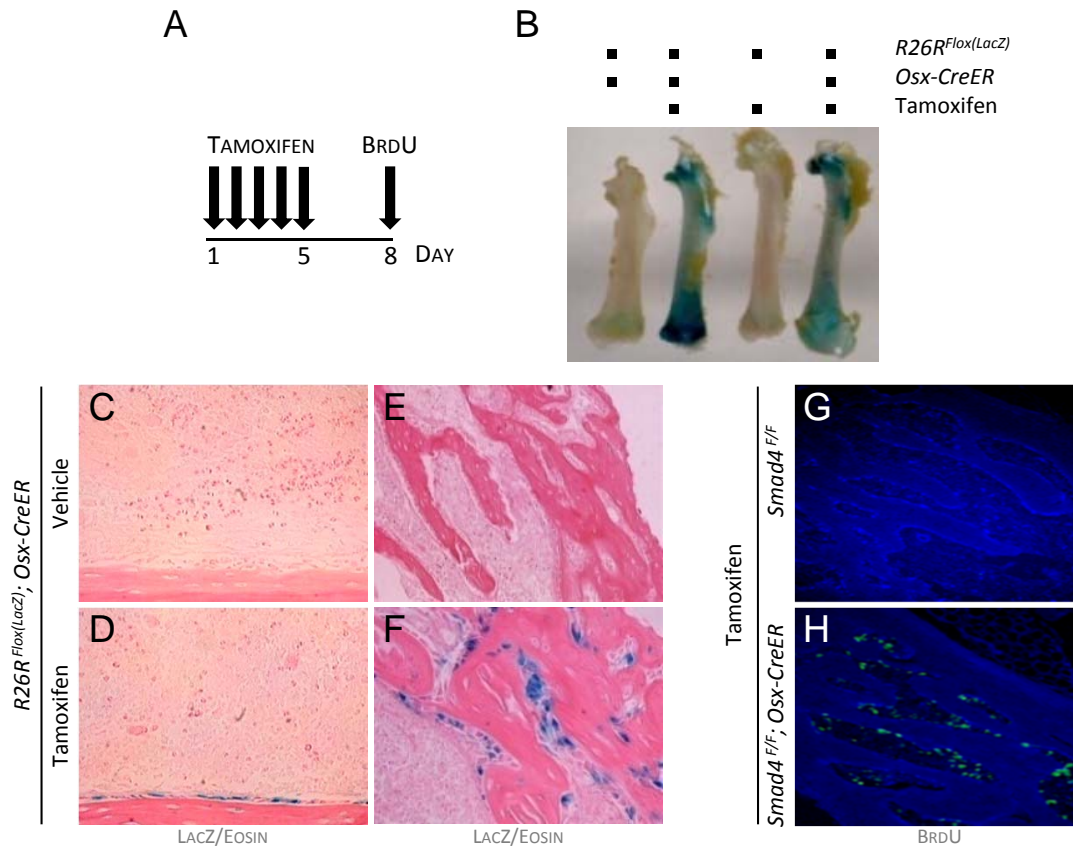

**Figure S2** Tamoxifen-dependent ablation of *Smad4* in *Osx*<sup>+</sup> cells of adult mice increases proliferation of cells adjacent to trabecular bone surfaces. **(A)** CreER activity was induced in *Osx-CreER* mice using 5 consecutive daily injections of tamoxifen (100 mg/kg i.p). Mitotic cells were labeled with a single dose of BrdU 2 hours prior to sacrifice on day 8. **(B)** Intact femurs were subjected to LacZ staining, **(C-F)** histologically sectioned, and then counterstained with Eosin to evaluate LacZ<sup>+</sup> cells in bone by bright field microscopy. **(C-D)** 20X images of the cortex in the mid-diaphysis and **(E-F)** 40X images of trabecular bone in the distal femur showing LacZ<sup>+</sup> cells on bone surfaces and embedded in bone matrix. **(G-H)** *Smad4*<sup>F/F</sup> and *Smad4*<sup>F/F</sup>; *Osx-CreER* mice were treated with tamoxifen and BrdU as indicated in **(A)**. Mitotic cells were visualized in histologic sections of the trochanter by BrdU immunofluorescence and DAPI.
